# Supplementary material
Source: PubMed Central journal article supplement (PMC3771555)
Supplement: supp_13-12301_IOVS-13-12301-s01.pdf [file supp_13-12301_IOVS-13-12301-s01.pdf]

## Appendix 1 The Age-Related Eye Disease Study 2 (AREDS2) Research Group

### (NEI) National Eye Institute

Emily Y. Chew, MD, Study Chair  
Frederick L. Ferris III, MD, NEI Clinical Director  
John Paul SanGiovanni, ScD, Project Officer  
Elvira Agrón, MA, Statistician

### Coordinating Center, The EMMES Corporation

Traci Clemons, PhD, Principal Investigator  
Anne Lindblad, PhD, Co-Investigator  
Robert Lindblad, MD, Chief Medical Officer  
Nilay Shah, MD, Medical Monitor  
Robert Sperduto, MD, Consultant  
Wendy McBee, MA, AREDS2 Project Director  
Gary Gensler, MS, Statistician  
Molly Harrington, MS, Statistician  
Alice Henning, MS, Genetics Project Director  
Katrina Jones Data Manager  
Kumar Thotapally Programmer  
Diana Tull, MA, CPS, Administrative Coordinator  
Valerie Watson Systems Coordinator  
Kayla Williams Data Manager  
Christina Gentry, Cognitive Function Specialist  
Francine Kaufman Cog. Function/Data Mgr  
Chris Morrison, Cognitive Function Specialist  
Elizabeth Saverino Protocol Monitor  
Sherrie Schenning Protocol Monitor

### Cardiovascular Outcomes Adjudicators

Denise Bonds, MD, MPH, (NHLBI)  
Bradford Worrell, MD, MSc, (UVA)  
Judith Hsia, MD  
Jennifer Robinson, MD, MPH  
Chuck Eaton, MD  
Alain Bertoni, MD

### Fundus Photograph Reading Center

Barbara Blodi, MD, Co-PI  
Ronald P. Danis, MD, Principal Investigator  
Matthew Davis, MD, Co-PI  
Amitha Domalpally Co-Director  
Kathy Glander Research Project Mgr  
Gregory Guilfoil Research Project Mgr  
Larry D. Hubbard, MA, Assoc. Dir. Grading  
Kristine Johnson Inventory Assistant  
Ronald Klein, MD, Co-PI  
Barbara Nardi Asst. to Ron Danis  
Michael Neider Assoc. Dir. Photography  
Nancy Robinson Assoc. Dir Operations  
Eileen Rosensteel Inventory Assistant  
Hugh Wabers Photographer  
Grace Zhang AREDS2 Data Manager

### (001) Vision Research Foundation

Alan J. Ruby, MD, (Site PI)  
Antonio Capone, Jr., MD, (Ophthalmologist)  
Bawa Dass, MD, (Ophthalmologist)  
Kimberly Drenser, MD, PhD, (Ophthalmologist)  
Bruce R. Garretson, MD, (Ophthalmologist)  
Tarek S. Hassan, MD, (Ophthalmologist)

Michael Trese, MD, (Ophthalmologist)  
George A. Williams, MD, (Ophthalmologist)  
Jeremy Wolfe, MD, (Ophthalmologist)  
Tina Bell (Clinic Coordinator)  
Mary Zajeckowski (Clinic Coordinator)  
Dennis Bezaire (Photographer)  
Fran Mclver (Photographer)  
Anthony Medina, CRA, (Photographer)  
Jackie Pagett (Photographer)  
Stephanie Hatch Smith (Photographer)  
Lynn Swartz (Photographer)  
Tom Treuter (Photographer)

### (002) Charlotte Eye Ear Nose and Throat Associates

Andrew Antoszyk, MD, (Site PI)  
Justin Brown, MD, (Ophthalmologist)  
David J. Browning, MD, PhD, (Ophthalmologist)  
Walter Holland, MD, (Ophthalmologist)  
Angella Karow (Clinic Coordinator)  
Kelly Stalford (Clinic Coordinator)  
Angela Price, MPH, CCRC, Dir. Of Research  
Sarah Ennis (Ophthalmic Technician)  
Sherry Fredenberg (Ophthalmic Technician)  
Jenna Herby (Ophthalmic Technician)  
Uma Balasubramaniam (Photographer)  
Loraine Clark (Photographer)  
Donna McClain (Photographer)  
Michael McOwen, CRA, (Photographer)  
Lynn Watson (Photographer)

### (003) Devers Eye Institute

Michael Klein, MD, (Site PI)  
Steven T. Bailey, MD, (Ophthalmologist)  
Thomas J. Hwang, MD, (Ophthalmologist)  
Andreas Lauer, MD, (Ophthalmologist)  
J. Timothy Stout, MD, PhD, FACS,  
(Ophthalmologist)  
Patty McCollum (Clinic Coordinator)  
Milt Johnson (Photographer)  
Patrick B. Rice CRA (Photographer)

### (004) Massachusetts Eye and Ear Infirmary

Ivana Kim, MD, (Site PI)  
John Loewenstein, MD, (Ophthalmologist)  
Joan Miller, MD, (Ophthalmologist)  
Lucia Sobrin, MD, (Ophthalmologist)  
Lucy Young, MD, PhD, (Ophthalmologist)  
Jacqueline Sullivan (Clinic Coordinator)  
Patricia Houlihan (Assistant Coordinator)  
Linda Merry, RN, (Assistant Coordinator)  
Ann Marie Lane (Office Manager)  
Ursula Lord Bator, OD, (Ophthalmic Technician)  
Claudia Evans, OD, (Ophthalmic Technician)  
Sarah Brett (Photographer)  
Charleen Callahan (Photographer)  
Marcia Grillo (Photographer)  
David Walsh (Photographer)  
Kamella Lau Zimmerman (Photographer)

**(005) Texas Retina Associates**

Gary Edd Fish, MD, JD, (Site PI)  
Rajiv Anand, MD, (Ophthalmologist)  
Lori E. Coors, MD, (Ophthalmologist)  
Dwain G. Fuller, MD, (Ophthalmologist)  
Rand Spencer, MD, (Ophthalmologist)  
Robert C. Wang, MD, (Ophthalmologist)  
Karen Duignan (Clinic Coordinator)  
Sally Arceneaux, COA, (Assistant Coordinator)  
Hank Aguado, CRA, (Photographer)  
Nicholas Hesse (Photographer)  
Michael Mackens (Photographer)  
Brian Swan (Photographer)

**(006) National Eye Institute**

Wai T. Wong, MD, PhD, (Site PI)  
Catherine Cukras, MD, (Ophthalmologist)  
Monica Dalal, MD, (Ophthalmologist)  
Naima Jacobs-El, MD, (Ophthalmologist)  
Catherine Meyerle, MD, (Ophthalmologist)  
Benjamin Nicholson, MD, (Ophthalmologist)  
Henry Wiley, MD, (Ophthalmologist)  
Katherine Hall Shimel, RN,COT,MSN, (Clinic Coordinator)  
Angel Garced, RN, (Assistant Coordinator)  
Janice Oparah, RN, (Assistant Coordinator)  
Greg Short, COMT, (Assistant Coordinator)  
Alana Temple, RN, (Assistant Coordinator)  
Babilonia Ayukawa, RN, (Phlebotomist)  
Guy Foster, COT, (Ophthalmic Technician)  
Darryl Hayes, COA, (Ophthalmic Technician)  
Dessie Koutsandreas (Ophthalmic Technician)  
Roula Nashwinter (Ophthalmic Technician)  
John Rowan (Ophthalmic Technician)  
Emily Y. Chew, MD, Study Chair (Project Sponsor Staff (NEI))  
Michael Bono (Photographer)  
Denise Cunningham (Photographer)  
Marilois Palmer (Photographer)  
Alicia Zetina (Photographer)

**(007) Ingalls Memorial Hospital**

David H. Orth, MD, (Site PI)  
Kourous Rezaei, MD, Co-PI (Site Co-PI)  
Joseph Civantos, MD, (Ophthalmologist)  
Sohail Hasan, MD, PhD, (Ophthalmologist)  
Kirk Packo, MD, (Ophthalmologist)  
Celeste Figliulo (Clinic Coordinator)  
Pam Stanberry (Phlebotomist)  
Tara Farmer (Photographer)  
Kiersten Nelson (Photographer)  
Shannya Townsend-Patrick (Photographer)

**(008) Bascom Palmer Eye Institute**

Philip Rosenfeld, MD,PhD, (Site PI)  
Royce Chen, MD, (Ophthalmologist)  
Rishi Doshi, MD, (Ophthalmologist)  
Sander Dubovy, MD, (Ophthalmologist)  
Brian T. Kim, MD, (Ophthalmologist)  
Matthew Lowrance, DO, (Ophthalmologist)  
Andrew Moshfeghi, MD, (Ophthalmologist)

Zayna Nahas, MD, (Ophthalmologist)  
Gary Schienbaum, MD, (Ophthalmologist)  
John Vishak, MD, (Ophthalmologist)  
Christina Weng, MD, (Ophthalmologist)  
Zohar Yehoshua, MD, (Ophthalmologist)  
Belen Rodriguez (Clinic Coordinator)  
Jose Rebimbas (Assistant Coordinator)  
Jane Gleichauf, RN, (Phlebotomist)  
Mike Kicak (Ophthalmic Technician)  
Jason Mena (Ophthalmic Technician)  
Tim Odem (Ophthalmic Technician)  
Elizabeth Sferza-Camp (Ophthalmic Technician)  
Alicia Disgdiertt (Photographer)  
Jim Oramas (Photographer)  
Isabel Rams (Photographer)  
Stephanie Thatcher (Photographer)

**(009) The Retina Division at the Wilmer Eye Institute**

Susan B. Bressler, MD, (Site PI)  
Neil M. Bressler, MD, (Ophthalmologist)  
Daniel Finkelstein, MD, (Ophthalmologist)  
Steven H Sherman, MD, (Ophthalmologist)  
Sharon Solomon, MD, (Ophthalmologist)  
Howard S. Ying, MD, (Ophthalmologist)  
Rita Denbow (Clinic Coordinator)  
Deborah Phillips (Assistant Coordinator)  
Elizabeth Radcliffe (Phlebotomist)  
Judy Belt (Photographer)  
Dennis Cain (Photographer)  
David Emmert (Photographer)  
Mark Herring (Photographer)  
Jacquelyn McDonald (Photographer)

**(010) Emory University Eye Center**

G. Baker Hubbard, MD, (Site PI)  
Chris S Bergstrom, MD, (Ophthalmologist)  
Blaine Cribbs, MD, (Ophthalmologist)  
Andrew Hendrick, MD, (Ophthalmologist)  
Brandon Johnson, MD, (Ophthalmologist)  
Philip Laird, MD, (Ophthalmologist)  
Sonia Mehta, MD, (Ophthalmologist)  
Timothy Olsen, MD, (Ophthalmologist)  
Justin Townsend, MD, (Ophthalmologist)  
Jion Yan, MD, (Ophthalmologist)  
Steven Yeh, MD, (Ophthalmologist)  
Linda Curtis, BSM, (Clinic Coordinator)  
Judy Brower (Assistant Coordinator)  
Hannah Yi (Assistant Coordinator)  
Jannah Rutter Dobbs (Photographer)  
Debbie Jordan (Photographer)

**(011) Elman Retina Group, PA**

Michael J. Elman, MD, (Site PI)  
Robert A Liss, MD, (Ophthalmologist)  
JoAnn Starr (Clinic Coordinator)  
Jennifer Belz (Assistant Coordinator)  
Charlene Putzulo (Assistant Coordinator)  
Teresa Coffey (Ophthalmic Technician)  
Ashley Davis (Ophthalmic Technician)  
Pamela Singletary (Ophthalmic Technician)  
Giorya Shabi Andreani (Photographer)

Theresa Cain (Photographer)  
Daniel Ketner (Photographer)  
Peter Sotirakos (Photographer)

**(012) University of Wisconsin**

Suresh Chandra, MD, (Site PI)  
Barbara A. Blodi, MD, (Site Co-PI)  
Michael M. Altaweel, MD, (Ophthalmologist)  
Ronald P. Danis, MD, (Ophthalmologist)  
Justin L. Gottlieb, MD, (Ophthalmologist)  
Michael Ip, MD, (Ophthalmologist)  
Ronald Klein, MD, (Ophthalmologist)  
T. Michael Nork, MD, (Ophthalmologist)  
Thomas S. Stevens, MD, (Ophthalmologist)  
Kathryn Burke (Clinic Coordinator)  
Shelly Olson (Clinic Coordinator)  
Kristine Dietzman (Assistant Coordinator)  
Barbara Soderling (Assistant Coordinator)  
Guy Somers, RN, (Assistant Coordinator)  
Angie Wealti (Assistant Coordinator)  
Denise Krolnik (Photographer)  
John Peterson (Photographer)  
Sandra Reed (Photographer)

**(013) UPMC Eye Center**

Thomas Friberg, MD, (Site PI)  
Andrew Eller, MD, (Ophthalmologist)  
Denise Gallagher, MD, (Ophthalmologist)  
Leanne Labriola, DO, (Ophthalmologist)  
Melissa Pokrifka (Clinic Coordinator)  
Aron Gedansky (Assistant Coordinator)  
Natalie Anthony (Photographer)  
Cassandra Grzybowski (Photographer)  
Dawn Matthews (Photographer)  
Sharon Murajda-Jumba (Photographer)  
Jessica Toro (Photographer)

**(014) Texas Retina Associates**

Gary Edd Fish, MD, JD, (Site PI)  
David G. Callanan, MD, (Ophthalmologist)  
Wayne A. Solley, MD, (Ophthalmologist)  
Patrick Williams, MD, (Ophthalmologist)  
Sandy Lash (Clinic Coordinator)  
Bob Boleman (Photographer)  
Chris Dock (Photographer)

**(015) Texas Retina Associates**

Gary Edd Fish, MD, JD, (Site PI)  
Michel Shami, MD, (Ophthalmologist)  
Brenda Arrington (Clinic Coordinator)  
Ashaki Meeks (Ophthalmic Technician)

**(017) Vision Research Foundation**

Alan J. Ruby, MD, (Site PI)  
Alan R Margherio, MD, (Ophthalmologist)  
Paul Raphaelian, MD, (Ophthalmologist)  
Debra Markus (Clinic Coordinator)  
Justin Langdon (Ophthalmic Technician)  
Elizabeth Truax (Ophthalmic Technician)  
Sandy Lewis (Photographer)  
Brad Terry (Photographer)

**(018) Vision Research Foundation**

Alan J. Ruby, MD, (Site PI)  
Amy Noffke, MD, (Ophthalmologist)  
Kean Oh, MD, (Ophthalmologist)  
Ramin Sarrafzadeh, MD, PhD, (Ophthalmologist)  
Scott Sneed, MD, (Ophthalmologist)  
Julie Hammersley, RN, (Clinic Coordinator)  
Serena Neal (Assistant Coordinator)  
Mary Doran (Ophthalmic Technician)  
Nan Jones (Ophthalmic Technician)  
Lisa Preston (Ophthalmic Technician)  
Heather Jessick (Photographer)  
Tanya Tracy Marsh (Photographer)

**(020) Center for Retina and Macular Disease**

Michael Tolentino, MD, (Site PI)  
Adam Berger, MD, (Ophthalmologist)  
Richard Hamilton, MD, (Ophthalmologist)  
David Misch, MD, (Ophthalmologist)  
Suk Jin Moon, MD, (Ophthalmologist)  
Dawn Sutherland (Clinic Coordinator)  
Vera Dilts (Assistant Coordinator)  
Sara Henderson (Assistant Coordinator)  
Esmeralda Medina (Assistant Coordinator)  
Donald Trueman (Assistant Coordinator)  
Laura Holm, LPN, (Ophthalmic Technician)  
Jason Strickland (Photographer)

**(021) Delaware Valley Retina Associates**

Darmakusuma le, MD, (Site PI)  
Jeffrey L. Lipkowitz MD (Ophthalmologist)  
Kekul B. Shah, MD, (Ophthalmologist)  
Susan Geraghty (Clinic Coordinator)  
Beverly Sannazzaro (Clinic Coordinator)  
Morgan Harper (Ophthalmic Technician)  
Krista Bayer (Photographer)

**(022) Eldorado Retina Associates, PC**

Mary B. Lansing, MD, (Site PI)  
Lauren B. Fox (Clinic Coordinator)  
Rebecca Lee (Photographer)

**(023) Georgia Retina, PC**

Jay B. Stallman, MD, FACS, (Site PI)  
Michael Jacobson, MD, (Ophthalmologist)  
Sean Koh, MD, (Ophthalmologist)  
Scott Lampert, MD, (Ophthalmologist)  
John Miller, MD, (Ophthalmologist)  
Mark Rivellese, MD, (Ophthalmologist)  
Atul Sharma, MD, (Ophthalmologist)  
Robert A. Stoltz, MD, (Ophthalmologist)  
Stephanie Vanderveldt, MD, (Ophthalmologist)  
Leslie Marcus (Clinic Coordinator)  
Starr Hendricks (Assistant Coordinator)  
Ryan Hollman (Assistant Coordinator)  
Gretel Betanzos (Ophthalmic Technician)  
Leslie Ellorin (Ophthalmic Technician)  
Shelly Fulbright (Ophthalmic Technician)  
Debbie McCormick (Photographer)

**(024) Henry Ford Health System - Eye Care Services**

Paul A. Edwards, MD, (Site PI)  
Julianne Hall (Clinic Coordinator)  
Mary Monk (Clinic Coordinator)  
Melanie Gutkowski (Assistant Coordinator)  
Melina Mazurek (Assistant Coordinator)  
Janet Murphy (Assistant Coordinator)  
Katherine Gusas (Office Manager)  
Crystal Moffett (Office Manager)  
David Burley (Photographer)  
Nicole Chesney (Photographer)  
Katie Kilgo (Photographer)  
Brian Rusinek (Photographer)  
Bradley Stern (Photographer)  
Tracy Troszak (Photographer)  
Rhonda Baker-Levingston (Pharmacist)

**(025) Paducah Retinal Center**

Carl W. Baker, MD, (Site PI)  
Tracey Caldwell (Clinic Coordinator)  
Tammy Walker (Assistant Coordinator)  
Lynnette F. Lambert (Ophthalmic Technician)  
Tracey Martin (Ophthalmic Technician)  
Mary Jill Palmer (Ophthalmic Technician)  
Tana Williams (Photographer)

**(026) Retina Associates of Cleveland**

Michael A Novak, MD, (Site PI)  
Joseph Coney, MD, (Ophthalmologist)  
David G. Miller, MD, (Ophthalmologist)  
Scott Pendergast, MD, (Ophthalmologist)  
Lawrence Singerman, MD, (Ophthalmologist)  
Nicholas Zakov, MD, (Ophthalmologist)  
Hernando Zegarra, MD, (Ophthalmologist)  
Kim DuBois (Clinic Coordinator)  
Susan Rath (Clinic Coordinator)  
Lori Revella (Clinic Coordinator)  
Tammy Brink (Ophthalmic Technician)  
Kim Drury (Ophthalmic Technician)  
Lisa Hogue (Ophthalmic Technician)  
Mary Ilc (Ophthalmic Technician)  
Connie Keller (Ophthalmic Technician)  
Elizabeth McNamara (Ophthalmic Technician)  
Vivian Tanner (Ophthalmic Technician)  
Tamara Cunningham (Photographer)  
John DuBois (Photographer)  
Gregg Greanoff (Photographer)  
Trina Nitzsche (Photographer)  
Sheila Smith-Brewer (Photographer)

**(027) Retina Associates of Kentucky**

Ricky D. Isernhagen, MD, (Site PI)  
John W. Kitchens, MD, (Ophthalmologist)  
Thomas W. Stone, MD, (Ophthalmologist)  
William J. Wood, MD, (Ophthalmologist)  
Diana Holcomb (Clinic Coordinator)  
Virginia Therrien (Office Manager)  
Michelle Buck, COT, (Ophthalmic Technician)  
Jeanne Van Arsdall (Ophthalmic Technician)  
Edward Slade, CRA,COA, (Photographer)

**(029) Retina Center Northwest**

Todd E. Schneiderman, MD, (Site PI)  
David J. Spinak, MD, (Ophthalmologist)  
Jackie Gaedke (Clinic Coordinator)  
Heather Davis Brown (Assistant Coordinator)  
Dan Helgren (Assistant Coordinator)  
Jenifer Garrison Pangelinan (Photographer)

**(030) Retina Group of Florida**

Lawrence Halperin, MD, (Site PI)  
Scott Anagnoste, MD, (Ophthalmologist)  
Mandeep Dhalla, MD, (Ophthalmologist)  
Krista Rosenberg, MD, (Ophthalmologist)  
Barry Taney, MD, (Ophthalmologist)  
W. Scott Thompson, MD, (Ophthalmologist)  
Jaclyn Lopez (Clinic Coordinator)  
Monica Hamlin (Assistant Coordinator)  
Monica Lopez (Assistant Coordinator)  
Jamie Mariano, COA, (Ophthalmic Technician)  
Evelyn Quinchia (Ophthalmic Technician)  
Patricia Aramayo (Photographer)  
Rita Veksler (Photographer)

**(031) Retina Northwest, PC**

Michael Lee, MD, (Site PI)  
Richard Dreyer, MD, (Ophthalmologist)  
Irvin Handelman, MD, (Ophthalmologist)  
Colin Ma, MD, (Ophthalmologist)  
Mark Peters, MD, (Ophthalmologist)  
Stephen Hobbs III (Clinic Coordinator)  
Amanda Milliron (Assistant Coordinator)  
Marcia Kopfer (Ophthalmic Technician)  
Michele Connaughton (Photographer)  
A. Christine Hoerner (Photographer)  
R. Joseph Logan (Photographer)  
Harry J. Wohlsein (Photographer)

**(032) Retina-Vitreous Associates Medical Group**

David Boyer, MD, (Site PI)  
Thomas G. Chu, MD, PhD, (Ophthalmologist)  
Pouya Dayani, MD, (Ophthalmologist)  
David Liao, MD, (Ophthalmologist)  
Roger L. Novack, MD, PhD, (Ophthalmologist)  
Firas M. Rahhal, MD, (Ophthalmologist)  
Richard Roe, MD, (Ophthalmologist)  
Homayoun Tabandeh, MD, (Ophthalmologist)  
Janet Bayramyan (Clinic Coordinator)  
Tammy Gasparyan (Assistant Coordinator)  
Connie Hoang (Assistant Coordinator)  
Janet Kurokouchi (Assistant Coordinator)  
Tammy Eileen Lo (Assistant Coordinator)  
Richard Ngo (Assistant Coordinator)  
Mary Ann Nguyen (Assistant Coordinator)  
Michael Peyton (Assistant Coordinator)  
Charles Yoon (Assistant Coordinator)  
Julio Sierra (Ophthalmic Technician)  
Adam Zamboni (Ophthalmic Technician)  
Jeff Kessinger (Photographer)  
Eric Protacio (Photographer)  
Adam Smucker (Photographer)

**(033) Retina Vitreous Consultants**

Pamela Rath, MD, (Site PI)  
Robert Bergren, MD, (Ophthalmologist)  
Bernard Doft, MD, (Ophthalmologist)  
Judy Liu, MD, (Ophthalmologist)  
Karl Olsen, MD, (Ophthalmologist)  
Lori Merlotti (Clinic Coordinator)  
Willia Ingram (Assistant Coordinator)  
Kellianne Marfisi (Ophthalmic Technician)  
Kimberly Yeckel (Ophthalmic Technician)  
Heather Schultz Carmelo (Photographer)  
Amanda Fec (Photographer)  
Keith McBroom (Photographer)  
David Steinberg (Photographer)

**(034) Sarasota Retina Institute**

Marc Levy, MD, (Site PI)  
Jody Abrams, MD, (Ophthalmologist)  
Melvin Chen, MD, (Ophthalmologist)  
Waldemar Torres, MD, (Ophthalmologist)  
Peggy Jelemensky (Clinic Coordinator)  
Mark Prybylski (Ophthalmic Technician)  
Tara Raphael (Ophthalmic Technician)  
Diana Appleby (Photographer)  
Charlotte Rodman (Photographer)  
Mark Sneath, COA, (Photographer)

**(035) Scott and White Memorial Hospital**

Robert H. Rosa, Jr., MD, (Site PI)  
Vanessa Hoelscher (Clinic Coordinator)  
Adelia Castano (Ophthalmic Technician)  
Jocelyn Parker (Photographer)

**(036) Southeastern Retina Associates, PC**

John Hoskins, MD, (Site PI)  
Nicholas Anderson, MD, (Ophthalmologist)  
Joseph Gooze, Jr., MD, (Ophthalmologist)  
Tod A McMillan, MD, (Ophthalmologist)  
James Miller Jr., MD, (Ophthalmologist)  
Stephen Perkins, MD, (Ophthalmologist)  
Kristina Oliver (Clinic Coordinator)  
Jennifer Beerbower (Ophthalmic Technician)  
Bruce Gilliland, OD, (Ophthalmic Technician)  
Cecile Hunt (Ophthalmic Technician)  
Mike Jacobus (Photographer)  
Raul Lince (Photographer)  
Christopher Morris (Photographer)  
Sarah Oelrich (Photographer)  
Jerry Whetstone (Photographer)

**(037) Southern California Desert Retina Consultants, MC**

Clement K. Chan, MD, (Site PI)  
Steven Lin, MD, (Ophthalmologist)  
Kim Walther (Clinic Coordinator)  
Tiana Gonzales (Assistant Coordinator)  
Lenise Myers (Ophthalmic Technician)  
Kenneth Huff, COA, (Photographer)

**(038) Retina Consultants of Houston**

David M. Brown, MD, (Site PI)  
Eric Chen, MD (Ophthalmologist)

Matthew S. Benz, MD, (Ophthalmologist)  
Richard H. Fish, MD, FACS, (Ophthalmologist)  
Rosa Y. Kim, MD, (Ophthalmologist)  
James Major Jr, MD, (Ophthalmologist)  
Tien Pei Wong, MD, (Ophthalmologist)  
Charles Wycoff, MD, PhD, (Ophthalmologist)  
Cassandra Cone (Clinic Coordinator)  
Debbie Goates Gilaspia (Assistant Coordinator)  
Nubia Landaverde (Assistant Coordinator)  
Robert Smith (Assistant Coordinator)  
Deneva Zamora (Assistant Coordinator)  
Veronica Sneed (Ophthalmic Technician)  
Melina Vela (Ophthalmic Technician)  
Eric Kegley (Photographer)

**(039) Wake Forest University Eye Center**

Craig Greven, MD, (Site PI)  
Shree Kurup, MD, (Ophthalmologist)  
Charles Richards, MD, (Ophthalmologist)  
Madison Slusher, MD, (Ophthalmologist)  
Cara Everhart (Clinic Coordinator)  
Joan Fish, RN, CCRC, (Assistant Coordinator)  
Mark Clark (Photographer)  
David Miller (Photographer)  
Marshall Tyler, CRA, FOPS, (Photographer)

**(040) West Coast Retina Medical Group, Inc.**

J. Michael Jumper, MD, (Site PI)  
Arthur D. Fu, MD, (Ophthalmologist)  
Robert N. Johnson, MD, (Ophthalmologist)  
Brandon Lujan, MD, (Ophthalmologist)  
H. Richard McDonald, MD, (Ophthalmologist)  
Rosa Rodriguez (Clinic Coordinator)  
Nina Ansari (Ophthalmic Technician)  
Jeanifer Joaquin (Ophthalmic Technician)  
Silvia Linares (Ophthalmic Technician)  
Lizette Lopez (Ophthalmic Technician)  
Jessica Sabio (Ophthalmic Technician)  
Sean Grout (Photographer)  
Chad Indermill (Photographer)  
Yesmin Urias (Photographer)  
Roberto Zimmerman (Photographer)

**(041) Veterans Affairs - Northern California Health Care System**

Linda Margulies, MD, (Site PI)  
Sara J. Schmidt, PharmD, (Clinic Coordinator)  
Joy L. Meier, PharmD, (Assistant Coordinator)  
Sherry L. Hadley COT(Ophthalmic Technician)

**(042) Mid-America Retina Consultants, PA**

William Rosenthal, MD, (Site PI)  
Barbara Johnson, RN, (Clinic Coordinator)  
Lois Swafford (Office Manager)  
Richard Shields, RN, (Ophthalmic Technician)  
R. Scott Varner (Photographer)

**(043) New York Eye and Ear Infirmary**

Richard Rosen, MD, (Site PI)  
Ronald Gentile, MD, (Ophthalmologist)  
Melissa Rivas (Clinic Coordinator)  
Katy W. Tai, CRC, (Assistant Coordinator)

Wanda Carrasquillo-Boyd (Photographer)  
Robert Masini (Photographer)

**(044) Ophthalmic Consultants of Long Island**

Glenn Stoller, MD, (Site PI)  
Ken Carnevale, MD, (Ophthalmologist)  
Diane M. LaRosa, CRNO, (Clinic Coordinator)  
Barbara Burger, RN, CCRC, (Assistant Coordinator)  
Tereza Conway (Assistant Coordinator)  
Carla Del Castillo (Assistant Coordinator)  
Julissa Diaz (Assistant Coordinator)  
Susan Jones (Assistant Coordinator)  
Nina Mondoc (Assistant Coordinator)  
Charlene Balfour (Ophthalmic Technician)  
CH Vitha (Ophthalmic Technician)  
Jennifer Lutz (Photographer)  
Barbara McGinley (Photographer)

**(045) The Research Foundation of SUNY/SB**

Fadi El Baba, MD, (Site PI)  
Ann Marie Lavana (Clinic Coordinator)  
Renee Jones (Assistant Coordinator)  
Jean Lewis (Assistant Coordinator)  
Ruth Tenzler, RN, BSN, (Assistant Coordinator)  
Mary Salvas-Mladek, CRA, (Ophthalmic Technician)  
Diane Van Kesteren, COA, (Ophthalmic Technician)

**(046) Western Carolina Retinal Associates**

W. Copley McLean, Jr., MD, (Site PI)  
W. Zachery Bridges, Jr., MD, (Ophthalmologist)  
Cameron Stone, MD, (Ophthalmologist)  
Denise Ammons (Clinic Coordinator)  
Mary Lamy (Assistant Coordinator)  
Andrea Menzel (Assistant Coordinator)  
Lea Doll Raymer (Assistant Coordinator)  
Barbara Campbell (Ophthalmic Technician)  
Lisa Hawkins (Ophthalmic Technician)  
Leslie Rickman (Ophthalmic Technician)  
Lorraine Sherlin (Ophthalmic Technician)  
Paula Price (Photographer)  
Albert Sinyai (Photographer)

**(047) Dean McGee Eye Institute**

Ronald Kingsley, MD, (Site PI)  
Reagan H. Bradford, Jr., MD, (Ophthalmologist)  
Robert E. Leonard II, MD, (Ophthalmologist)  
Sonny Icks (Clinic Coordinator)  
Vanessa Bergman (Ophthalmic Technician)  
Brittany Ross (Ophthalmic Technician)  
Russ Burris (Photographer)  
Amanda Butt (Photographer)  
Rob Richmond (Photographer)

**(048) Northwestern University, Ophthalmology**

Alice Lyon, MD, (Site PI)  
Manjot Gill, MD, (Ophthalmologist)  
Lee Jampol, MD, (Ophthalmologist)  
Rukhsana Mizra, MD, (Ophthalmologist)  
Zuzanna Rozenbajgier (Clinic Coordinator)

Jeremy Chapman (Assistant Coordinator)  
Lori Kaminski (Assistant Coordinator)  
Andrea Degillio (Photographer)  
Evica Simjanoski, CRA, (Photographer)

**(049) Ophthalmic Consultants of Boston**

Jeffrey Heier, MD, (Site PI)  
Hyung Cho, MD, (Ophthalmologist)  
Tina Scheufele Cleary, MD, (Ophthalmologist)  
Darin Goldman, MD, (Ophthalmologist)  
Chirag Shah, MD, (Ophthalmologist)  
Trexler Topping, MD, (Ophthalmologist)  
Marissa Weber, MD, (Ophthalmologist)  
Torsten Wiegand, MD, PhD, (Ophthalmologist)  
Jeremy Schindelheim (Clinic Coordinator)  
Joy Bankert (Assistant Coordinator)  
Jennifer Stone (Assistant Coordinator)  
Alison Nowak (Office Manager)  
Sandy Chong (Ophthalmic Technician)  
Lindsay Williams (Ophthalmic Technician)  
Steven Bennett (Photographer)  
Dennis Donovan (Photographer)  
Margaret Graham (Photographer)  
Cullen Jones (Photographer)

**(050) Pacific Eye Associates**

Anne Fung, MD, (Site PI)  
Jan-Kristine Bayabo (Clinic Coordinator)  
Razelda Bosch (Assistant Coordinator)  
Esperanza Cruz (Assistant Coordinator)  
Ashley Emerson (Assistant Coordinator)  
Alycia Fleming (Ophthalmic Technician)  
Denice Barsness (Photographer)  
Jorge Rodriguez (Photographer)  
Marina Soboleva (Photographer)

**(051) Penn State M.S. Hershey Medical Center**

Ingrid U. Scott, MD, MPH, (Site PI)  
Esther Bowie, MD, (Ophthalmologist)  
Kimberly A Neely, MD, PhD, (Ophthalmologist)  
David A. Quillen, MD, (Ophthalmologist)  
Laura Walter (Clinic Coordinator)  
Timothy Bennett (Photographer)  
James Strong (Photographer)

**(052) Palmetto Retina Center**

John Wells, III, MD, (Site PI)  
Lloyd Clark, MD, (Ophthalmologist)  
David Johnson, MD, (Ophthalmologist)  
Peggy Miller (Clinic Coordinator)  
Mallie Taylor (Assistant Coordinator)  
Tiffany Swinford (Ophthalmic Technician)  
Robbin Spivey (Photographer)

**(053) Pennsylvania Retina Specialists, PC**

Michael Banach, MD, (Site PI)  
Lawrence Ho, MD, (Ophthalmologist)  
Richard Lanning, MD, (Ophthalmologist)  
Thomas R Pheasant, MD, (Ophthalmologist)  
Jay G Prensky, MD, (Ophthalmologist)  
Steven Truong, MD, (Ophthalmologist)  
Julia Teatsworth, COT, (Clinic Coordinator)

Michelle Dietrich (Assistant Coordinator)  
Ann Wasilus (Phlebotomist)  
Ann Miller (Ophthalmic Technician)  
Megan Rakes (Ophthalmic Technician)  
Teresa Slagle (Ophthalmic Technician)  
Michelle Richards (Photographer)  
Patricia Schuessler (Photographer)  
Lacy Stover (Photographer)

**(054) Retina Consultants, PLLC**

Paul Beer, MD, (Site PI)  
Naomi S. Falk, MD, (Ophthalmologist)  
Mary Beth Shannon (Clinic Coordinator)  
Jeannie Olmeda (Ophthalmic Technician)  
Don Berdeen (Photographer)  
Joseph F. Fisher, Jr. (Photographer)

**(055) University of Iowa**

James Folk, MD, (Site PI)  
Stephen Russell, MD, (Ophthalmologist)  
Barbara Taylor (Clinic Coordinator)  
Connie Hinz (Assistant Coordinator)  
Jean Walshire (Assistant Coordinator)  
Heather Stockman (Ophthalmic Technician)  
Bruce Critser (Photographer)  
Stefani Karakas (Photographer)  
Cindy Montague (Photographer)  
Randy Verdick (Photographer)

**(056) Wills Eye Hospital/Mid Atlantic Retina**

Omesh Gupta, MD, (Site PI)  
Joseph Maguire, MD, (Site PI)  
Christopher Brady, MD, (Ophthalmologist)  
Francis Char DeCroos, MD, (Ophthalmologist)  
Michael Dollin, MD, (Ophthalmologist)  
Sunir Garg, MD, (Ophthalmologist)  
Adam Gerstenblith, MD, (Ophthalmologist)  
Julia Haller, MD, (Ophthalmologist)  
Allen C. Ho, MD, (Ophthalmologist)  
Jason Hsu, MD, (Ophthalmologist)  
Richard Kaiser, MD, (Ophthalmologist)  
John Pitcher, MD, (Ophthalmologist)  
Carl Regillo, MD, (Ophthalmologist)  
Rajiv Shah, MD, (Ophthalmologist)  
Marc Spirn, MD, (Ophthalmologist)  
William Tasman, MD, (Ophthalmologist)  
James Vander, MD, (Ophthalmologist)  
Noga Senderowitsch (Clinic Coordinator)  
Michele Formoso (Assistant Coordinator)  
Michelle Markun (Assistant Coordinator)  
Cedric George  
Christina Centinaro (Ophthalmic Technician)  
Lisa Grande (Ophthalmic Technician)  
Stefanie Carey (Photographer)  
Elaine Liebenbaum (Photographer)

**(057) Doheny Eye Institute USC**

SriniVas Satta, MD, (Site PI)  
Mark Humayun, MD, PhD, (Ophthalmologist)  
Rachel Sierra (Clinic Coordinator)  
Elizabeth Corona (Assistant Coordinator)  
Margaret Padilla (Assistant Coordinator)

Moonseok Nu (Office Manager)  
Sylvia Ramos (Ophthalmic Technician)  
Cullen Barnett (Photographer)  
Glenn Currie (Photographer)  
Cornelia Gottlieb (Photographer)

**(058) The Retina Group of Washington**

Richard Garfinkel, MD, (Site PI)  
Daniel Berinstein, MD, (Ophthalmologist)  
Marcus Colyer, MD, (Ophthalmologist)  
William Deegan, III, MD, (Ophthalmologist)  
Michael Min-Shyue Lai, MD, (Ophthalmologist)  
Robert Murphy, MD, (Ophthalmologist)  
Michael Osman, MD, (Ophthalmologist)  
Michael Rivers, MD, (Ophthalmologist)  
Reginald Sanders, MD, (Ophthalmologist)  
Manfred A. von Fricken, MD, (Ophthalmologist)  
Debbie Oliver (Clinic Coordinator)  
Jeanne Kirshon (Assistant Coordinator)  
Tanya Alexander Snowden (Assistant Coordinator)  
Thomas Blondo (Ophthalmic Technician)  
Alysia Cronise (Ophthalmic Technician)  
Vanessa Denny (Ophthalmic Technician)  
Kylie Mendez (Ophthalmic Technician)  
Janine Newgen (Ophthalmic Technician)  
Justin Davis (Photographer)  
Mike Flory (Photographer)  
Robert Frantz (Photographer)  
Bryan Murphy (Photographer)  
Steve Rauch (Photographer)

**(060) The Medical College of Wisconsin**

Judy E. Kim, MD, (Site PI)  
Jane Bachman, OD, (Ophthalmologist)  
Thomas B. Connor, Jr., MD, (Ophthalmologist)  
Dennis P. Han, MD, (Ophthalmologist)  
Kimberly Stepian, MD, (Ophthalmologist)  
David V. Weinberg, MD, (Ophthalmologist)  
William J. Wirostko, MD, (Ophthalmologist)  
Krissa Packard (Clinic Coordinator)  
Tracy Kaczanowski (Assistant Coordinator)  
Vesper Williams (Assistant Coordinator)  
Vicki Barwick (Ophthalmic Technician)  
Judy Flanders (Ophthalmic Technician)  
Dennis Backes (Photographer)  
Joe Beringer (Photographer)  
Kristy Keller (Photographer)  
Kathy Selchert (Photographer)

**(061) John Moran Eye Center**

Paul Bernstein, MD, PhD, (Site PI)  
Michael Teske, MD, (Ophthalmologist)  
Albert Vitale, MD, (Ophthalmologist)  
Susan Allman, COA, (Clinic Coordinator)  
Bonnie Carlstrom COA (Assistant Coordinator)  
Kimberley Wegner (Assistant Coordinator)  
Anne Haroldsen (Office Manager)  
Deborah Harrison, MS, (Office Manager)  
Cyrie Fry (Photographer)  
James Gilman, CRA, (Photographer)  
Glen Jenkins (Photographer)

Paula Morris, CRA, (Photographer)

**(063) Loma Linda University**

Michael Rauser, MD, (Site PI)  
Joseph Fan, MD, (Ophthalmologist)  
Mukesh Suthar, MD, (Ophthalmologist)  
Gisela Santiago (Clinic Coordinator)  
Kara Rollins Halsey (Assistant Coordinator)  
Christy Quesada (Assistant Coordinator)  
William Kiernan, OD, (Ophthalmic Technician)  
Jesse Knabb (Photographer)

**(064) Baylor College of Medicine**

Richard Alan Lewis, MD, MS, (Site PI)  
Cindy Dorenbach, COT, (Clinic Coordinator)  
Steven Spencer, COMT, (Ophthalmic Technician)  
Dana Barnett (Photographer)  
Joseph Morales, CRA, (Photographer)

**(066) Carolina Retina Center**

Barron C. Fishburne, MD, (Site PI)  
Jeffrey G. Gross, MD, (Ophthalmologist)  
Michael A. Magee, MD, (Ophthalmologist)  
Amy Flowers (Clinic Coordinator)  
Angie McDowell (Ophthalmic Technician)  
Randall Price (Photographer)

**(067) Case Western Reserve University**

Suber Huang, MD, MBA, (Site PI)  
Johnny Tang, MD, (Ophthalmologist)  
Shawn Wilker, MD, (Ophthalmologist)  
Cherie Hornsby (Clinic Coordinator)  
Lisa Ferguson (Assistant Coordinator)  
Kirk Krogstad (Assistant Coordinator)  
Riva Adamovsky (Ophthalmic Technician)  
Peggy Allchin (Ophthalmic Technician)  
Kathleen Carlton (Ophthalmic Technician)  
Claudia Clow (Ophthalmic Technician)  
Kelly Sholtis (Ophthalmic Technician)  
Stephanie Burke (Photographer)  
Mark Harrod (Photographer)  
Stacie Hrvatin (Photographer)  
Geoffrey Pankhurst (Photographer)

**(069) Eye Foundation of Kansas City**

Nelson R. Sabates, MD, (Site PI)  
Michael Cassell, MD, (Ophthalmologist)  
Komal Desai, MD, (Ophthalmologist)  
Abraham Poulouse, MD, (Ophthalmologist)  
Felix Sabates, MD, (Ophthalmologist)  
Yin Chen (Clinic Coordinator)  
Gary Gallimore, COMT, (Photographer)  
Yolanda Konior (Photographer)

**(070) Jones Eye Institute - UAMS**

Nicola Kim, MD, (Site PI)  
Sami Uwaydat (Ophthalmologist)  
Deborah Troillett (Clinic Coordinator)  
Karen Aletter (Photographer)

**(071) Kresge Eye Institute**

Robert N. Frank, MD, (Site PI)

Gary Abrams, MD, (Ophthalmologist)  
James Puklin, MD, (Ophthalmologist)  
Asheesh Tewari, MD, (Ophthalmologist)  
Cheryl Milanovic (Clinic Coordinator)  
Melanie Bailey (Photographer)  
David Griffith (Photographer)  
Dena McDonald (Photographer)  
Kit Morehead (Photographer)  
Zlatan Sadikovic (Photographer)  
Lisa Schillace (Photographer)  
Elizabeth Silvis (Photographer)

**(072) Colorado Retina Associates PC**

Brian Joondeph, MD, (Site PI)  
Nancy Christmas, MD, (Ophthalmologist)  
David Johnson, MD, (Ophthalmologist)  
Alan Kimura, MD, (Ophthalmologist)  
Mimi Liu, MD, (Ophthalmologist)  
Stephen Petty, MD, (Ophthalmologist)  
John Zilis, MD, (Ophthalmologist)  
Jenny Benitez (Clinic Coordinator)  
Cassandra Berryman Catlett (Assistant Coordinator)  
Eric Fluegel, RN, (Assistant Coordinator)  
Shane Mowry (Photographer)  
Hoang Nguyen (Photographer)  
David Reflow (Photographer)

**(074) UNC Department of Ophthalmology**

Odette M. Houghton, MD, (Site PI)  
Seema Garg, MD, PhD, (Ophthalmologist)  
Maurice B. Landers, MD, (Ophthalmologist)  
Travis Meredith, MD, (Ophthalmologist)  
Sandy Barnhart, MPH, (Clinic Coordinator)  
Megha Karmalkar (Assistant Coordinator)  
Debra Cantrell (Photographer)  
Rona Lyn Esquejo-Leon (Photographer)  
Linda Manor (Pharmacist)  
Sue Pope (Pharmacist)  
David Stines (Pharmacist)  
Amelia Stokely (Pharmacist)

**(075) University Health Care - Mason Eye Institute**

Dean Hainsworth, MD, (Site PI)  
Dyann Helming (Clinic Coordinator)  
Debbie Eichelberger (Office Manager)  
Mary Paige Leaton (Ophthalmic Technician)  
Chuck Hamm (Photographer)

**(076) University of Tennessee HSC**

Edward Chaum, MD, PhD, (Site PI)  
Alessandro Iannaccone, MD, (Ophthalmologist)  
Barbara Jennings, MA, OD, (Clinic Coordinator)  
Tracy Murray (Ophthalmic Technician)  
Joe Mastellone (Photographer)

**(077) Fletcher Allen Health Care**

Robert Millay, MD, (Site PI)  
Brian Kim, MD, (Ophthalmologist)  
Theresa Goddard (Clinic Coordinator)  
Liza Jarrett Beaudette (Ophthalmic Technician)  
Nina Changelian-Aitken (Ophthalmic Technician)



Fernando Corrada (Photographer)  
Jason Dubuque (Photographer)

**(078) Mayo Clinic**

Raymond Iezzi, MD, (Site PI)  
Sophie J. Bakri, MD, (Ophthalmologist)  
Jose S. Pulido, MD, (Ophthalmologist)  
Diane Vogen (Clinic Coordinator)  
Rebecca Nielsen, LPN, (Assistant Coordinator)  
Karin Berg (Ophthalmic Technician)  
Jean Burrington, COA, (Ophthalmic Technician)  
Shannon Howard, COA, (Ophthalmic Technician)  
Joan Overend (Ophthalmic Technician)  
Zbigniew Krason (Photographer)  
Denise Lewison (Photographer)  
Thomas Link, CRA, (Photographer)

**(079) The Retina Institute**

Kevin J. Blinder, MD, (Site PI)  
Nicholas E. Engelbrecht, MD, (Ophthalmologist)  
M. Gilbert Grand, MD, (Ophthalmologist)  
Daniel P. Joseph, MD, PhD, (Ophthalmologist)  
Gaurav K. Shah, MD, (Ophthalmologist)  
Bradley Smith, MD, (Ophthalmologist)  
Matthew Thomas, MD, (Ophthalmologist)  
Rhonda Weeks (Clinic Coordinator)  
Lynda Boyd (Ophthalmic Technician)  
Dana Gabel (Photographer)

**(080) Yale University Eye Center**

Ron Adelman, MD, (Site PI)  
John Huang, MD, (Ophthalmologist)  
James Kempton, MD, (Ophthalmologist)  
Aaron Parnes, MD, (Ophthalmologist)  
Jennifer Dupont (Clinic Coordinator)  
Elizabeth Perotti (Assistant Coordinator)  
Victoria Donaldson (Ophthalmic Technician)  
Kenneth Fong (Photographer)  
Pamela Ossorio (Photographer)

**(081) Vanderbilt Eye Institute**

Anita Agarwal, MD, (Site PI)  
Paul Sternberg, MD, (Ophthalmologist)  
Sandy Owings (Clinic Coordinator)  
Tony Adkins (Photographer)  
Elaine Lok (Photographer)  
Garvin Munn (Photographer)  
Buddy Skellie (Photographer)

**(082) UMDNJ**

Neelakshi Bhagat, MD, MPH, (Site PI)  
Monique S. Roy, MD, (Ophthalmologist)  
Marco Zarbin, MD, PhD, (Ophthalmologist)  
Catherine Fay (Clinic Coordinator)  
Michael Lazar (Photographer)  
Beth Malpica (Photographer)  
Tatiana Mikheyav (Photographer)

**(084) The University of Illinois**

Lawrence Ulanski II, MD, (Site PI)  
Jennifer Lim, MD, (Ophthalmologist)  
Marcia Niec, BS CCRP, (Clinic Coordinator)

Tametha Johnson (Ophthalmic Technician)  
Yesenia Ovando (Ophthalmic Technician)  
Catherine Nail Carroll (Photographer)  
Mark Janowicz (Photographer)

**(085) Jules Stein Eye Institute**

Steven Schwartz, MD, (Site PI)  
David Cupp, MD, (Ophthalmologist)  
Michael Gorin, MD, PhD, (Ophthalmologist)  
Gad Heilweil, MD, (Ophthalmologist)  
Hamid Hosseini, MD, (Ophthalmologist)  
Jean-Pierre Hubschman, MD, (Ophthalmologist)  
Allan Kreiger, MD, (Ophthalmologist)  
Tara Young McCannel, MD, (Ophthalmologist)  
Carolyn Pan, MD, (Ophthalmologist)  
David Sarraf, MD, (Ophthalmologist)  
Irena Tsui, MD, (Ophthalmologist)  
Joshua Udoetek MD (Ophthalmologist)  
Vinad Voleti, MD, (Ophthalmologist)  
Logan Hitchcock (Clinic Coordinator)  
Rosaleen Ostrick (Assistant Coordinator)  
Melissa Chun, OD, (Ophthalmic Technician)  
Jennie Kageyama, OD, (Ophthalmic Technician)  
Nilo Davila (Photographer)  
Kristin Lipka (Photographer)  
Christina Shin (Pharmacist)

**(086) Univ. of Alabama at Birmingham**

Cynthia Owsley, PhD, (Site PI)  
Michael Albert, Jr., MD, (Ophthalmologist)  
Richard Feist, MD, (Ophthalmologist)  
John Mason, MD, (Ophthalmologist)  
Martin Thomley, MD, (Ophthalmologist)  
Angelia Johnson (Clinic Coordinator)  
Mark Clark (Assistant Coordinator)  
Tracy Emond (Assistant Coordinator)  
Joanna Hamela (Assistant Coordinator)  
Angela Marsh (Office Manager)  
Karen Searcey (Office Manager)  
Kia Rookard (Ophthalmic Technician)

**(087) UT Southwestern Medical Center**

Yu-Guang He, MD, (Site PI)  
Rafael L. Ufret-Vincenty, MD, (Ophthalmologist)  
Mike Molai (Clinic Coordinator)  
William Anderson (Photographer)  
John Horna (Photographer)

**(088) Ohio State University**

Alan Letson, MD, (Site PI)  
Colleen Cebulla, MD, PhD, (Ophthalmologist)  
Susie Chang, MD, (Ophthalmologist)  
Fred Davidorf, MD, (Ophthalmologist)  
Jill Salerno (Clinic Coordinator)  
Laura Sladoje (Office Manager)  
Christina Stetson (Office Manager)  
Jeri Perry (Ophthalmic Technician)  
Scott Savage (Photographer)

**(089) Duke University**

Cynthia Toth, MD, (Site PI)  
Glenn Jaffe, MD, (Ophthalmologist)

Stefanie Schuman, MD, (Ophthalmologist)  
Neeru Sarin, MBBS, (Clinic Coordinator)  
Jim Crowell (Photographer)  
Tiffanie Keaton (Photographer)  
Michael Kelly (Photographer)  
Brian Lutman (Photographer)  
Marriner Skelly (Photographer)  
Lauren Welch (Photographer)

**(090) University of California, Davis**

Lawrence Morse, MD, PhD, (Site PI)  
Allan Hunter, MD, (Ophthalmologist)  
Susanna Soon-Chun Park MD, PhD  
(Ophthalmologist)  
Cynthia Wallace (Clinic Coordinator)  
Ember Dhillon (Assistant Coordinator)  
Marisa Salvador (Assistant Coordinator)  
Barbara Holderreed (Office Manager)  
Karishma Chandra (Photographer)  
Sashi Kaur (Photographer)  
Ellen Redenbo (Photographer)  
Smiley Hom (Pharmacist)

**(091) Manhattan Eye, Ear and Throat Hospital**

Michael Cooney, MD, (Site PI)  
Irene Barbazetto, MD, (Ophthalmologist)  
James M. Klancnik, Jr., MD, (Ophthalmologist)  
John A. Sorenson, MD, (Ophthalmologist)  
Lawrence Yannuzzi, MD, (Ophthalmologist)  
Maria Scolaro (Clinic Coordinator)  
Eugene Agresta (Photographer)  
Nancy Gonzalez (Photographer)

**(092) University of Florida**

Sandeep Grover, MD, (Site PI)  
K.V. Chalam, MD, PhD, (Ophthalmologist)  
Shailesh Gupta, MD, (Ophthalmologist)  
Christopher Lyons (Clinic Coordinator)  
Wenhua Li (Assistant Coordinator)  
Chirag Patel, MD, (Assistant Coordinator)  
Jose Carrion (Photographer)

**(093) Shiley Eye Center - UCSD**

Henry Ferreyra, MD, (Site PI)  
Amberly Rodriguez (Clinic Coordinator)  
Iliana Molina (Assistant Coordinator)  
Gabriel Balea (Photographer)  
Pam Emory (Photographer)  
Marlene Rico (Photographer)  
Giorgio Siqueiros (Photographer)

**(094) Scheie Eye Institute**

Alexander J. Brucker, MD, (Site PI)  
Joshua Dunaief, MD, (Ophthalmologist)  
Juan Grunwald, MD, (Ophthalmologist)  
Benjamin Kim, MD, (Ophthalmologist)  
Albert M. Maguire, MD, (Ophthalmologist)  
Brian VanderBeek, MD, (Ophthalmologist)  
Sheri Drossner, MSW, (Clinic Coordinator)  
Joan DuPont (Assistant Coordinator)  
Rebecca Salvo (Assistant Coordinator)  
Jim Berger (Photographer)

Cheryl Devine (Photographer)  
Bill Nyberg (Photographer)  
Laurel Weeney (Photographer)

**(095) University of Rochester Eye Institute**

David DiLoreto, MD, (Site PI)  
Mina Chung, MD, (Ophthalmologist)  
Valerie Davis (Clinic Coordinator)  
Peter MacDowell (Assistant Coordinator)  
George O Gara (Assistant Coordinator)  
Daniel Castillo (Ophthalmic Technician)  
Andrea Czubinski (Ophthalmic Technician)  
Melissa Keim (Ophthalmic Technician)  
Brandi Hardy (Photographer)  
Rachel Grunhaus Hollar (Photographer)  
Lynn Schueckler (Photographer)

**(148) NorthShore University HealthSystems**

Alice T. Lyon, MD, (Site PI)  
Aaron Weinberg, MD, Site Co-PI  
Mira Shiloach (Clinic Coordinator)  
Nicole Pelkofer (Ophthalmic Technician)  
Qin Zhou (Ophthalmic Technician)  
Laura McPoland (Photographer)

**(179) Washington University School of Medicine**

Rajendra Apte, MD, PhD, (Site PI)  
P. Kumar Rao, MD, (Ophthalmologist)  
Sam Pistorius (Clinic Coordinator)  
Jamie Kambarian (Assistant Coordinator)  
Eve Adcock (Ophthalmic Technician)  
Sarah Gould (Ophthalmic Technician)  
Melanie Quinn (Ophthalmic Technician)  
Rhonda Curtis (Photographer)  
Amy Frost (Photographer)  
Charla Meyer (Photographer)  
Greg Rathert (Photographer)
